# Supplementary material for: Self-Reported Usage, Functional Benefit, and Audiologic Characteristics of Cochlear Implant Patients Who Use a Contralateral Hearing Aid
Source: PubMed Central journal article supplement — Trends Hear. 2017 Mar 29;21:2331216517699530. doi: 10.1177/2331216517699530 (PMC5435367; doi:10.1177/2331216517699530), 2017-03-29
Supplement: TIA699530_supplementary_material1.pdf [file TIA699530_supplementary_material1.pdf]

The supplementary material includes the instructions given the participants, the questions asked, and a tabulation of the responses. Where applicable, the responses of all participants are summarized, along with a breakdown according to whether participants discontinued hearing aid use or continued hearing aid use.

**Questionnaire: Use of hearing aid after cochlear implantation**

Instructions: Some people who have received a cochlear implant continue to use a hearing aid in the opposite ear and others do not. Through these questions we are trying to learn more about the reasons people decide whether or not to use a hearing aid with the cochlear implant.

Please answer each question by checking the appropriate box.

**Your Experience With Hearing Aids Before You Received Your Cochlear Implant**

| Q1--Before receiving your cochlear implant, how many hearing aids did you use?                           |           |         |  |                          |         |  |                       |         |
|----------------------------------------------------------------------------------------------------------|-----------|---------|--|--------------------------|---------|--|-----------------------|---------|
|                                                                                                          | Total     |         |  | Discontinued hearing aid |         |  | Continued hearing aid |         |
| Response                                                                                                 | Frequency | Percent |  | Frequency                | Percent |  | Frequency             | Percent |
| one                                                                                                      | 27        | 28.72   |  | 3                        | 21.43   |  | 24                    | 30.00   |
| two                                                                                                      | 67        | 71.28   |  | 11                       | 78.57   |  | 56                    | 70.00   |
| Total                                                                                                    | 94        | 100.00  |  | 14                       | 100.00  |  | 80                    | 100.00  |
| Q2-- Who dispensed your hearing aids?                                                                    |           |         |  |                          |         |  |                       |         |
| Q3--Do you continue to go to your hearing aid dispenser for follow-up care now that you have an implant? |           |         |  |                          |         |  |                       |         |
| Response                                                                                                 | Frequency | Percent |  | Frequency                | Percent |  | Frequency             | Percent |
| yes                                                                                                      | 64        | 71.11   |  | 1                        | 7.69    |  | 63                    | 81.82   |
| no                                                                                                       | 26        | 28.89   |  | 12                       | 92.31   |  | 14                    | 18.18   |
| Total                                                                                                    | 90        | 100.00  |  | 13                       | 100.00  |  | 77                    | 100.00  |

| Q4--At the time you received your cochlear implant, how old were your hearing aids? |           |         |  |           |         |  |           |         |
|-------------------------------------------------------------------------------------|-----------|---------|--|-----------|---------|--|-----------|---------|
| Response                                                                            | Frequency | Percent |  | Frequency | Percent |  | Frequency | Percent |
| less than 2 years old                                                               | 28        | 30.77   |  | 2         | 14.29   |  | 26        | 33.77   |
| 2-4 years old                                                                       | 27        | 29.67   |  | 4         | 28.57   |  | 23        | 29.87   |
| 4-6 years old                                                                       | 21        | 23.08   |  | 5         | 35.71   |  | 16        | 20.78   |
| more than 6 years old                                                               | 12        | 13.19   |  | 2         | 14.29   |  | 10        | 12.99   |
| I do not remember                                                                   | 3         | 3.30    |  | 1         | 7.14    |  | 2         | 2.60    |
| Total                                                                               | 91        | 100.00  |  | 14        | 100.00  |  | 77        | 100.00  |
| Q5--How much did you wear your hearing aid(s) before you received your implant?     |           |         |  |           |         |  |           |         |
| Response                                                                            | Frequency | Percent |  | Frequency | Percent |  | Frequency | Percent |
| more than 10 hours/day                                                              | 79        | 85.87   |  | 11        | 78.57   |  | 68        | 87.18   |
| 5-10 hours/day                                                                      | 12        | 13.04   |  | 2         | 14.29   |  | 10        | 12.82   |
| less than 5 hours/day                                                               | 1         | 1.09    |  | 1         | 7.14    |  | 0         | 0.00    |
| never                                                                               | 0         | 0.00    |  | 0         | 0.00    |  | 0         | 0.00    |
| Total                                                                               | 92        | 100.00  |  | 14        | 100.00  |  | 78        | 100.00  |
| Q6--All in all, how helpful was your hearing aid(s)?                                |           |         |  |           |         |  |           |         |
| Response                                                                            | Frequency | Percent |  | Frequency | Percent |  | Frequency | Percent |
| very helpful                                                                        | 31        | 33.70   |  | 2         | 14.29   |  | 29        | 37.18   |
| somewhat helpful                                                                    | 49        | 53.26   |  | 10        | 71.43   |  | 39        | 50.00   |
| rarely helpful                                                                      | 10        | 10.87   |  | 2         | 14.29   |  | 8         | 10.26   |
| not at all helpful                                                                  | 2         | 2.17    |  | 0         | 0.00    |  | 2         | 2.56    |
| Total                                                                               | 92        | 100.00  |  | 14        | 100.00  |  | 78        | 100.00  |

| Q7--How do you feel that you coped with your hearing loss before you received your implant? |           |         |  |           |         |  |           |         |
|---------------------------------------------------------------------------------------------|-----------|---------|--|-----------|---------|--|-----------|---------|
| Response                                                                                    | Frequency | Percent |  | Frequency | Percent |  | Frequency | Percent |
| well all of the time                                                                        | 8         | 8.70    |  | 1         | 7.14    |  | 7         | 8.97    |
| well much of the time                                                                       | 26        | 28.26   |  | 2         | 14.29   |  | 24        | 30.77   |
| well some of the time                                                                       | 34        | 36.96   |  | 5         | 35.71   |  | 29        | 37.18   |
| not well at all (it really affected me negatively)                                          | 24        | 26.09   |  | 6         | 42.86   |  | 18        | 23.08   |
| Total                                                                                       | 92        | 100.00  |  | 14        | 100.00  |  | 78        | 100.00  |

### **Your experience with your cochlear implant**

| Q8--How long have you been using your cochlear implant? |           |         |  |           |         |  |           |         |
|---------------------------------------------------------|-----------|---------|--|-----------|---------|--|-----------|---------|
| Response                                                | Frequency | Percent |  | Frequency | Percent |  | Frequency | Percent |
| 0-1 months                                              | 0         | 0.00    |  | 0         | 0.00    |  | 0         | 0.00    |
| 2-5 months                                              | 16        | 17.02   |  | 0         | 0.00    |  | 16        | 20.00   |
| 6-11 months                                             | 13        | 13.83   |  | 2         | 14.29   |  | 11        | 13.75   |
| 1-2 years                                               | 28        | 29.79   |  | 3         | 21.43   |  | 25        | 31.25   |
| more than 2 years                                       | 37        | 39.36   |  | 9         | 64.29   |  | 28        | 35.00   |
| Total                                                   | 94        | 100.00  |  | 14        | 100.00  |  | 80        | 100.00  |

| Q9--How do you feel that you cope with your hearing loss now that you have your implant? |           |         |  |           |         |  |           |         |
|------------------------------------------------------------------------------------------|-----------|---------|--|-----------|---------|--|-----------|---------|
| Response                                                                                 | Frequency | Percent |  | Frequency | Percent |  | Frequency | Percent |
| well all of the time                                                                     | 23        | 25.27   |  | 4         | 30.77   |  | 19        | 24.36   |
| well much of the time                                                                    | 56        | 61.54   |  | 8         | 61.54   |  | 48        | 61.54   |
| well some of the time                                                                    | 10        | 10.99   |  | 0         | 0.00    |  | 10        | 12.82   |
| not well at all (it really affects me negatively)                                        | 2         | 2.20    |  | 1         | 7.69    |  | 1         | 1.28    |
| Total                                                                                    | 91        | 100.00  |  | 13        | 100.00  |  | 78        | 100.00  |

| Q10--How well do you hear with your cochlear implant? |           |         |  |           |         |  |           |         |
|-------------------------------------------------------|-----------|---------|--|-----------|---------|--|-----------|---------|
| Response                                              | Frequency | Percent |  | Frequency | Percent |  | Frequency | Percent |
| about the same as with my hearing aid(s)              | 4         | 4.40    |  | 0         | 0.00    |  | 4         | 5.19    |
| better than with my hearing aid(s)                    | 80        | 87.91   |  | 14        | 100.00  |  | 66        | 85.71   |
| worse than with my hearing aid(s)                     | 7         | 7.69    |  | 0         | 0.00    |  | 7         | 9.09    |
| Total                                                 | 91        | 100.00  |  | 14        | 100.00  |  | 77        | 100.00  |

**Your decision process about using a hearing aid with your cochlear implant**

| Q11--Had you made a decision before your surgery about whether you would use your hearing aid with your cochlear implant? |           |         |  |           |         |  |           |         |
|---------------------------------------------------------------------------------------------------------------------------|-----------|---------|--|-----------|---------|--|-----------|---------|
| Response                                                                                                                  | Frequency | Percent |  | Frequency | Percent |  | Frequency | Percent |
| yes                                                                                                                       | 76        | 82.61   |  | 9         | 64.29   |  | 67        | 85.90   |
| no                                                                                                                        | 16        | 17.39   |  | 5         | 35.71   |  | 11        | 14.10   |
| Total                                                                                                                     | 92        | 100.00  |  | 14        | 100.00  |  | 78        | 100.00  |
| Q12--Did your audiologist encourage you to try wearing your hearing aid with your cochlear implant?                       |           |         |  |           |         |  |           |         |
| Response                                                                                                                  | Frequency | Percent |  | Frequency | Percent |  | Frequency | Percent |
| Yes, before my surgery                                                                                                    | 22        | 24.18   |  | 2         | 14.29   |  | 20        | 25.97   |
| Yes, after my surgery                                                                                                     | 5         | 5.49    |  | 0         | 0.00    |  | 5         | 6.49    |
| Yes, both before and after my surgery                                                                                     | 47        | 51.65   |  | 10        | 71.43   |  | 37        | 48.05   |
| No                                                                                                                        | 10        | 10.99   |  | 2         | 14.29   |  | 8         | 10.39   |
| I can't remember                                                                                                          | 7         | 7.69    |  | 0         | 0.00    |  | 7         | 9.09    |
| Total                                                                                                                     | 91        | 100.00  |  | 14        | 100.00  |  | 77        | 100.00  |

**If you continue to use a hearing aid go to question 13.**

**If you do not use a hearing aid with your cochlear implant, go to question 32.**

**Your experience with hearing aids after you received your cochlear implant**

| <b>Continuing HA users</b>                                                                      |                  |                |
|-------------------------------------------------------------------------------------------------|------------------|----------------|
| Q13--Has the hearing in your un-implanted ear changed since you received your cochlear implant? |                  |                |
| <b>Response</b>                                                                                 | <b>Frequency</b> | <b>Percent</b> |
| Don't notice any difference                                                                     | 38               | 48.10          |
| seems a little worse                                                                            | 22               | 27.85          |
| seems a little better                                                                           | 8                | 10.13          |
| seems a lot worse                                                                               | 7                | 8.86           |
| seems a lot better                                                                              | 4                | 5.06           |
| Total                                                                                           | 79               | 100.00         |
|                                                                                                 |                  |                |
| Q14--Are you using the same hearing aid now as when you first received your cochlear implant?   |                  |                |
| <b>Response</b>                                                                                 | <b>Frequency</b> | <b>Percent</b> |
| yes                                                                                             | 59               | 74.68          |
| no                                                                                              | 20               | 25.32          |
| Total                                                                                           | 79               | 100.00         |
|                                                                                                 |                  |                |
| Q15--What is the manufacturer and model of your hearing aid?                                    |                  |                |
|                                                                                                 |                  |                |
| Q16--How old is the hearing aid?                                                                |                  |                |
| <b>Response</b>                                                                                 | <b>Frequency</b> | <b>Percent</b> |
| Less than 2 years old                                                                           | 30               | 38.96          |
| 2-4 years old                                                                                   | 29               | 37.66          |
| 4-6 years old                                                                                   | 12               | 15.58          |
| More than 6 years old                                                                           | 6                | 7.79           |
| I do not remember                                                                               | 0                | 0.00           |
| Total                                                                                           | 77               | 100.00         |

| Q17--How much do you wear your hearing aid with your cochlear implant? |                  |                |
|------------------------------------------------------------------------|------------------|----------------|
| <b>Response</b>                                                        | <b>Frequency</b> | <b>Percent</b> |
| More than 10 hours a day                                               | 64               | 81.01          |
| 5-10 hours a day                                                       | 14               | 17.72          |
| Less than 5 hours a day                                                | 1                | 1.27           |
| Never                                                                  | 0                | 0.00           |
| Total                                                                  | 79               | 100.00         |
| Q18--Do you ever use only your cochlear implant?                       |                  |                |
| <b>Response</b>                                                        | <b>Frequency</b> | <b>Percent</b> |
| Never                                                                  | 33               | 41.25          |
| Sometimes                                                              | 42               | 52.50          |
| Often                                                                  | 5                | 6.25           |
| Almost Always                                                          | 0                | 0.00           |
| Total                                                                  | 80               | 100.00         |
| Q19--Do you ever use only your hearing aid?                            |                  |                |
| <b>Response</b>                                                        | <b>Frequency</b> | <b>Percent</b> |
| Never                                                                  | 43               | 53.75          |
| Sometimes                                                              | 35               | 43.75          |
| Often                                                                  | 2                | 2.50           |
| Almost Always                                                          | 0                | 0.00           |
| Total                                                                  | 80               | 100.00         |

| Q20--When did you start using your hearing aid and cochlear implant together?        |                  |                |
|--------------------------------------------------------------------------------------|------------------|----------------|
| <b>Response</b>                                                                      | <b>Frequency</b> | <b>Percent</b> |
| Right away                                                                           | 68               | 85.00          |
| Within 1-3 months of the implant                                                     | 10               | 12.50          |
| Within 3-6 months of the implant                                                     | 1                | 1.25           |
| After the first 6 months of the implant                                              | 1                | 1.25           |
| Total                                                                                | 80               | 100.00         |
|                                                                                      |                  |                |
| Q21--How fast did you adapt to using your hearing aid and cochlear implant together? |                  |                |
| <b>Response</b>                                                                      | <b>Frequency</b> | <b>Percent</b> |
| Right away                                                                           | 45               | 56.96          |
| within 1-3 months of the implant                                                     | 23               | 29.11          |
| Within 3-6 months of the implant                                                     | 4                | 5.06           |
| After the first 6 months of the implant                                              | 5                | 6.33           |
| I still have not adapted to using both together                                      | 2                | 2.53           |
| Total                                                                                | 79               | 100.00         |
|                                                                                      |                  |                |
| Q22--In the past year, did you need to have your hearing aid adjusted?               |                  |                |
| <b>Response</b>                                                                      | <b>Frequency</b> | <b>Percent</b> |
| Not at all                                                                           | 36               | 46.15          |
| 1-3 times                                                                            | 37               | 47.44          |
| 3-6 times                                                                            | 3                | 3.85           |
| More than 6 times                                                                    | 2                | 2.56           |
| Total                                                                                | 78               | 100.00         |
|                                                                                      |                  |                |

| Q23--How do you set the volume on your hearing aid and on your cochlear implant when you wear both?      |                  |                |
|----------------------------------------------------------------------------------------------------------|------------------|----------------|
| <b>Response</b>                                                                                          | <b>Frequency</b> | <b>Percent</b> |
| My hearing aid does not have a volume control                                                            | 15               | 18.75          |
| I always keep my hearing aid at the same volume                                                          | 20               | 25.00          |
| I usually keep the same HA volume but adjust the CI volume                                               | 17               | 21.25          |
| I usually keep the same CI volume but adjust my HA volume                                                | 17               | 21.25          |
| I usually adjust my HA and CI to different volume settings for different situations                      | 11               | 13.75          |
| Total                                                                                                    | 80               | 100.00         |
|                                                                                                          |                  |                |
| Q24--If your hearing aid has multiple programs (or memories), do you always wear it at the same program? |                  |                |
| <b>Response</b>                                                                                          | <b>Frequency</b> | <b>Percent</b> |
| My hearing aid only has one program                                                                      | 24               | 30.77          |
| I always keep my hearing aid on the same program, with or without the CI                                 | 38               | 48.72          |
| I usually change hearing aid programs with the use of my CI                                              | 12               | 15.38          |
| I usually change both my hearing aid and my implant processor when I am using both devices               | 4                | 5.13           |
| Total                                                                                                    | 78               | 100.00         |
|                                                                                                          |                  |                |
| Q25--In quiet listening situations, you hear better with your:                                           |                  |                |
| <b>Response</b>                                                                                          | <b>Frequency</b> | <b>Percent</b> |
| Cochlear implant only                                                                                    | 3                | 3.75           |
| Hearing aid only                                                                                         | 2                | 2.50           |
| Cochlear implant + hearing aid                                                                           | 73               | 91.25          |
| No difference with any of the above                                                                      | 2                | 2.50           |
| Total                                                                                                    | 80               | 100.00         |
|                                                                                                          |                  |                |



| Q26--In a noisy situation, you hear better with your:   |                  |                |
|---------------------------------------------------------|------------------|----------------|
| <b>Response</b>                                         | <b>Frequency</b> | <b>Percent</b> |
| Cochlear implant only                                   | 4                | 5.06           |
| Hearing aid only                                        | 2                | 2.53           |
| Cochlear implant + hearing aid                          | 62               | 78.48          |
| No difference with any of the above                     | 11               | 13.92          |
| Total                                                   | 79               | 100.00         |
|                                                         |                  |                |
| Q27--In places with an echo, you hear better with your: |                  |                |
| <b>Response</b>                                         | <b>Frequency</b> | <b>Percent</b> |
| Cochlear implant only                                   | 2                | 2.78           |
| Hearing aid only                                        | 5                | 6.94           |
| Cochlear implant + hearing aid                          | 50               | 69.44          |
| No difference with any of the above                     | 15               | 20.83          |
| Total                                                   | 72               | 100.00         |
|                                                         |                  |                |
| Q28--Music sounds best with your:                       |                  |                |
| <b>Response</b>                                         | <b>Frequency</b> | <b>Percent</b> |
| Cochlear implant only                                   | 1                | 1.33           |
| Hearing aid only                                        | 11               | 14.67          |
| Cochlear implant + hearing aid                          | 51               | 68.00          |
| No difference with any of the above                     | 12               | 16.00          |
| Total                                                   | 75               | 100.00         |
|                                                         |                  |                |

| Q29--Does wearing both hearing aid and cochlear implant help you decide which direction sounds are coming from? |                  |                |
|-----------------------------------------------------------------------------------------------------------------|------------------|----------------|
| <b>Response</b>                                                                                                 | <b>Frequency</b> | <b>Percent</b> |
| Never                                                                                                           | 20               | 25.32          |
| Sometimes                                                                                                       | 35               | 44.30          |
| Often                                                                                                           | 16               | 20.25          |
| Almost Always                                                                                                   | 8                | 10.13          |
| Total                                                                                                           | 79               | 100.00         |
|                                                                                                                 |                  |                |
| Q30--When you use your cochlear implant and hearing aid together, where do you hear the sound?                  |                  |                |
| <b>Response</b>                                                                                                 | <b>Frequency</b> | <b>Percent</b> |
| In the middle of my head                                                                                        | 24               | 32.43          |
| Closer to the ear with implant                                                                                  | 27               | 36.49          |
| Closer to the ear with the hearing aid                                                                          | 7                | 9.46           |
| Separately in both ears                                                                                         | 16               | 21.62          |
| Total                                                                                                           | 74               | 100.00         |
|                                                                                                                 |                  |                |
| Q31--When you use your cochlear implant and hearing aid together, where is the sound louder?                    |                  |                |
| <b>Response</b>                                                                                                 | <b>Frequency</b> | <b>Percent</b> |
| In the implant ear                                                                                              | 41               | 58.57          |
| In the hearing aid ear                                                                                          | 11               | 15.71          |
| It is the same in both ears                                                                                     | 18               | 25.71          |
| Total                                                                                                           | 70               | 100.00         |

**Please answer these questions if you do not use a hearing aid with your cochlear implant**

**Your experience with hearing aids after your cochlear implant surgery**

| <b>Discontinued HA users</b>                                                                      |                  |                |
|---------------------------------------------------------------------------------------------------|------------------|----------------|
| Q32--After receiving your implant, how long did you use your hearing aid in the other ear?        |                  |                |
| <b>Response</b>                                                                                   | <b>Frequency</b> | <b>Percent</b> |
| I did not use my hearing aid at all                                                               | 0                | 0.00           |
| I used my hearing aid for less than 1 day                                                         | 0                | 0.00           |
| I used my hearing aid for less than a week                                                        | 0                | 0.00           |
| I used my hearing aid for 1-4 weeks                                                               | 0                | 0.00           |
| I used my hearing aid for 1-6 months                                                              | 7                | 50.00          |
| I used my hearing aid for 6-12 months                                                             | 1                | 7.14           |
| I used my hearing aid for more than 1 year                                                        | 6                | 42.86          |
| Total                                                                                             | 14               | 100.00         |
|                                                                                                   |                  |                |
| Q33--In which of the following settings did you wear your hearing aid with your cochlear implant? |                  |                |
| <b>Please check ALL that apply.</b>                                                               |                  |                |
| <b>Response</b>                                                                                   | <b>Frequency</b> |                |
| I wore my hearing aid at work only.                                                               | 1                |                |
| I wore my hearing aid at home only.                                                               | 2                |                |
| I wore my hearing aid at home and work                                                            | 1                |                |
| I wore my hearing aid everywhere I went.                                                          | 9                |                |
| I did not wear my hearing aid.                                                                    | 0                |                |

| Q34--In which of the following listening conditions did you wear your hearing aid with your cochlear implant?<br><b>Please check ALL that apply.</b>                                                                                                                                                                                 |                  |  |
|--------------------------------------------------------------------------------------------------------------------------------------------------------------------------------------------------------------------------------------------------------------------------------------------------------------------------------------|------------------|--|
| <b>Response</b>                                                                                                                                                                                                                                                                                                                      | <b>Frequency</b> |  |
| I did not wear my hearing aid at all.                                                                                                                                                                                                                                                                                                | 0                |  |
| I wore my hearing aid only in noisy situations.                                                                                                                                                                                                                                                                                      | 1                |  |
| I wore my hearing aid only in quiet situations.                                                                                                                                                                                                                                                                                      | 0                |  |
| I wore my hearing aid in both noisy and quiet situations.                                                                                                                                                                                                                                                                            | 11               |  |
| I wore my hearing aid when listening to music.                                                                                                                                                                                                                                                                                       | 2                |  |
| Other                                                                                                                                                                                                                                                                                                                                | 0                |  |
|                                                                                                                                                                                                                                                                                                                                      |                  |  |
| Q35--How did speech sound when you used your hearing aid with your cochlear implant?<br><b>Please check ALL that apply.</b>                                                                                                                                                                                                          |                  |  |
| <b>Response</b>                                                                                                                                                                                                                                                                                                                      | <b>Frequency</b> |  |
| Speech was not clear                                                                                                                                                                                                                                                                                                                 | 3                |  |
| Speech was too loud.                                                                                                                                                                                                                                                                                                                 | 0                |  |
| There was interference between the cochlear implant and the hearing aid.                                                                                                                                                                                                                                                             | 3                |  |
| Other (see below)                                                                                                                                                                                                                                                                                                                    | 6                |  |
| Sound was more natural when only using CI<br>Speech was clearer. Then started to diminish.<br>Initially was fine using both, but my hearing declined and I relied only on the implant<br>Speech sounded normal in my ear with the hearing aid. Although speech sounded normal, I could not understand many words.<br>Speech was fine |                  |  |

| Q36--When you used your hearing aid with your cochlear implant, did you use the same hearing aid as before your surgery? |           |         |
|--------------------------------------------------------------------------------------------------------------------------|-----------|---------|
| Response                                                                                                                 | Frequency | Percent |
| yes                                                                                                                      | 13        | 92.86   |
| no                                                                                                                       | 1         | 7.14    |
| Total                                                                                                                    | 14        | 100.00  |

| Q37--How old was the hearing aid you used with your cochlear implant? |           |         |
|-----------------------------------------------------------------------|-----------|---------|
| Response                                                              | Frequency | Percent |
| More than 10 years old                                                | 0         | 0.00    |
| 5-10 years old                                                        | 4         | 28.57   |
| 3-5 years old                                                         | 3         | 21.43   |
| <3 years old                                                          | 7         | 50.00   |
| Total                                                                 | 14        | 100.00  |

| Q38--Did your audiologist make any adjustments to your hearing aid with your cochlear implant? |           |         |
|------------------------------------------------------------------------------------------------|-----------|---------|
| Response                                                                                       | Frequency | Percent |
| yes                                                                                            | 4         | 30.77   |
| no                                                                                             | 9         | 69.23   |
| Total                                                                                          | 13        | 100.00  |

| Q39--Why did you decide not to continue to use a hearing aid with your cochlear implant?<br>Please check ALL that apply. |           |         |
|--------------------------------------------------------------------------------------------------------------------------|-----------|---------|
| Response                                                                                                                 | Frequency | Percent |
| The hearing aid was not helpful.                                                                                         | 9         |         |
| The sound from the hearing aid interfered with the sound from the implant.                                               | 2         |         |
| Sound was too loud.                                                                                                      | 0         |         |
| The added expense in using the hearing aid.                                                                              | 1         |         |
| It was too much bother to use both the implant and the hearing aid.                                                      | 1         |         |

|                                                                                                                                                                                                                                                                                                                                                                                                                                                                                                                                                                                                                                                                 |   |  |
|-----------------------------------------------------------------------------------------------------------------------------------------------------------------------------------------------------------------------------------------------------------------------------------------------------------------------------------------------------------------------------------------------------------------------------------------------------------------------------------------------------------------------------------------------------------------------------------------------------------------------------------------------------------------|---|--|
| I did not like the way it looked to wear both the implant and the hearing aid.                                                                                                                                                                                                                                                                                                                                                                                                                                                                                                                                                                                  | 0 |  |
| Other (see below)                                                                                                                                                                                                                                                                                                                                                                                                                                                                                                                                                                                                                                               | 7 |  |
| <p>Received CI in other ear after 3 yrs of having CI in right ear.<br/>                 I could not understand many words with my hearing aid although I could hear the words.<br/>                 I had a very severe loss and had to keep the volume very high. The feedback was more of a problem than aid was of help.<br/>                 Experienced severe vertigo/dizziness from HA six months after CI activation.<br/>                 ENT Dr. told me to quit using the HA. He said it was garbage in/garbage out and that I was 85% deaf in the left ear.<br/>                 Due to tinnitus as well<br/>                 Hearing got worse</p> |   |  |
